# Supplementary figures and images for: A DNA barcode reference of Asian ferns with expert-identified voucher specimens and DNA samples
Source: PubMed Central journal article supplement — Sci Data. 2024 Dec 2;11:1314. doi: 10.1038/s41597-024-04161-8 (PMC11612234; doi:10.1038/s41597-024-04161-8), 2024-12-02

# Primer sets & Amplicon for NGS sequencing

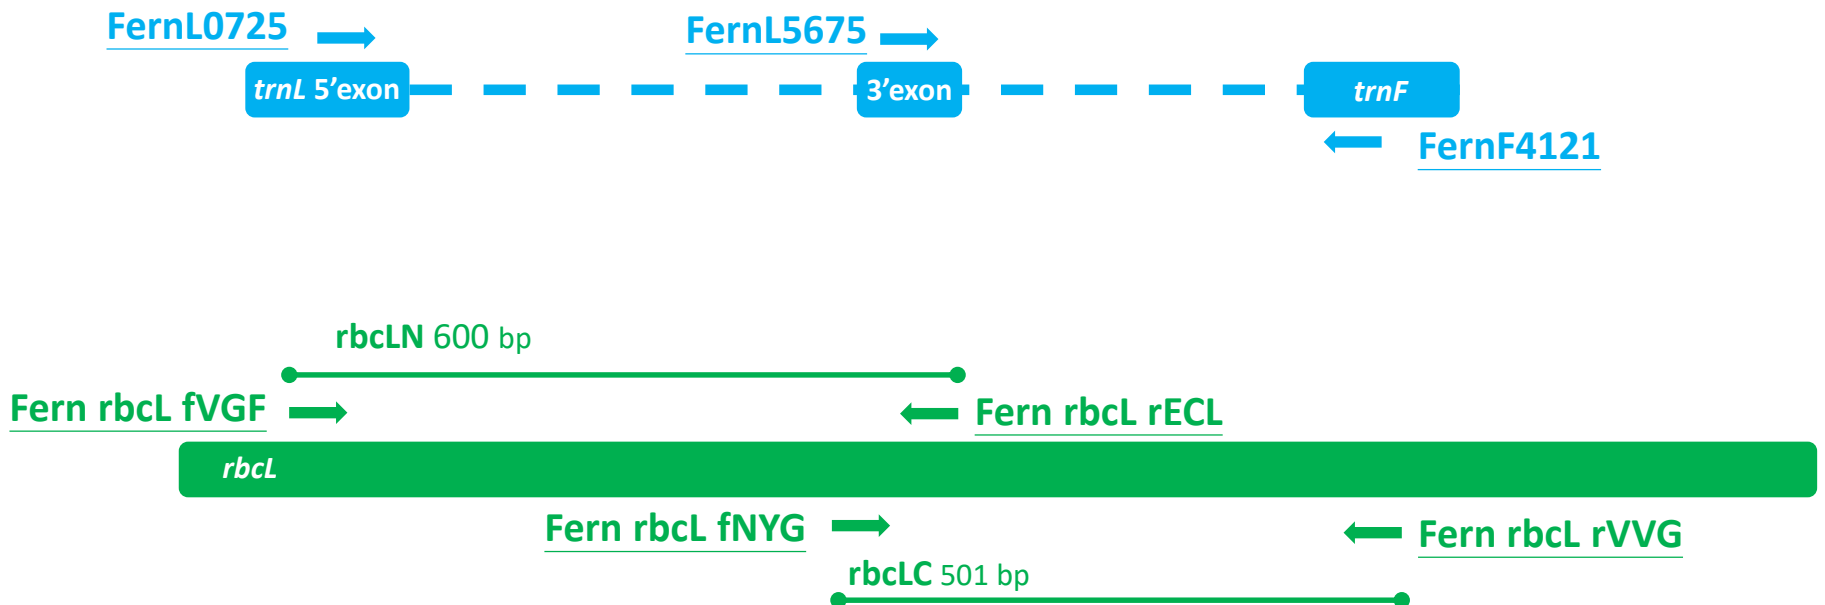

Supplement: 41597_2024_4161_MOESM2_ESM.pdf [file 41597_2024_4161_MOESM2_ESM.pdf]
